# Supplementary material
Source: Springer Nature journal article supplement (https://www.springermedizin.de/resource/supplementary/12881_2013_1134_MOESM2_ESM.pdf/9451784)

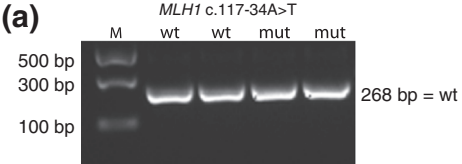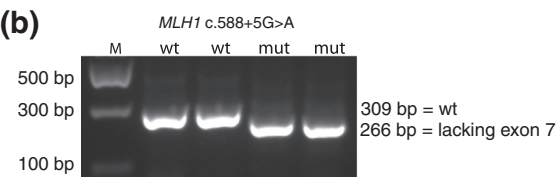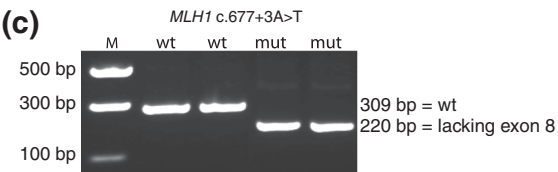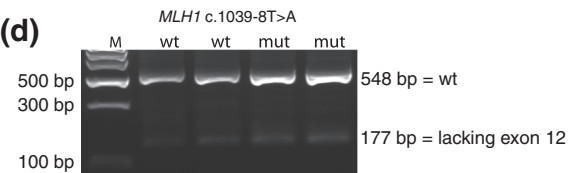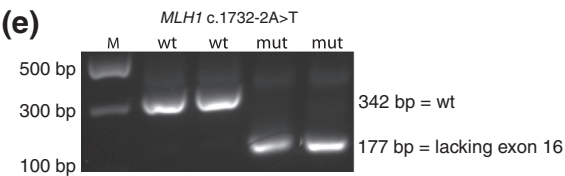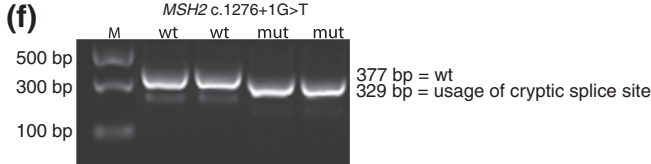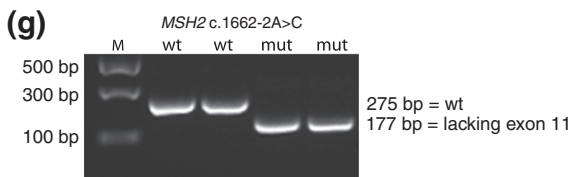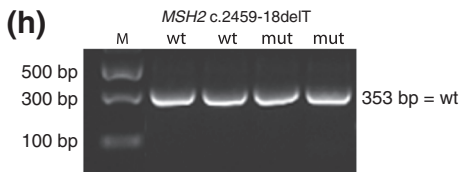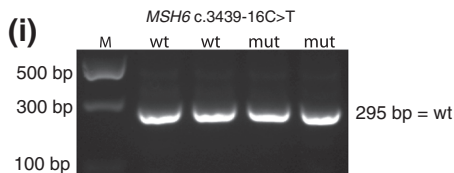

Supplement: MOESM2 [file 9451784]
